# Supplementary material for: A comparative study of nine berberine salts in the solid state: optimization of the photoluminescence and self-association properties through the choice of the anion
Source: Royal Society of Chemistry journal article supplement (doi:10.1039/c6cp05848e), 2016-01-01
Supplement: c6cp05848e1.pdf [file c6cp05848e1.pdf]

## Supplementary Information

### Comparative Study of Nine Berberine Salts in the Solid State: Optimization of the Photoluminescence and Self-Association Properties through the Choice of the Anion

Marine Soulié, Chantal Carayon, Nathalie Saffon, Sylvie Blanc, and Suzanne Fery-Forgues

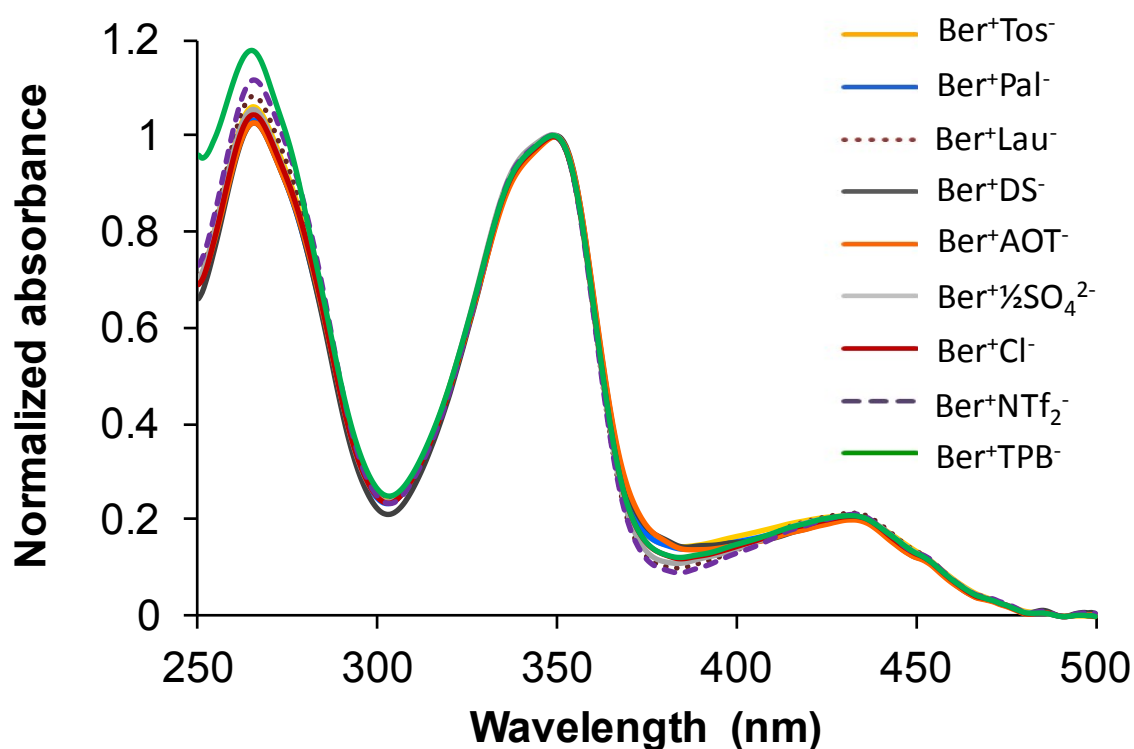

**Figure S1.** Normalized absorption spectra of the berberine salts in acetonitrile. Concentration between  $2 \times 10^{-5}$  M and  $4.4 \times 10^{-5}$  M. A fourth intense band is between 200 and 250 nm. The small differences observed at high wavelength are due to absorption of the anion (e.g. TPB<sup>-</sup>).

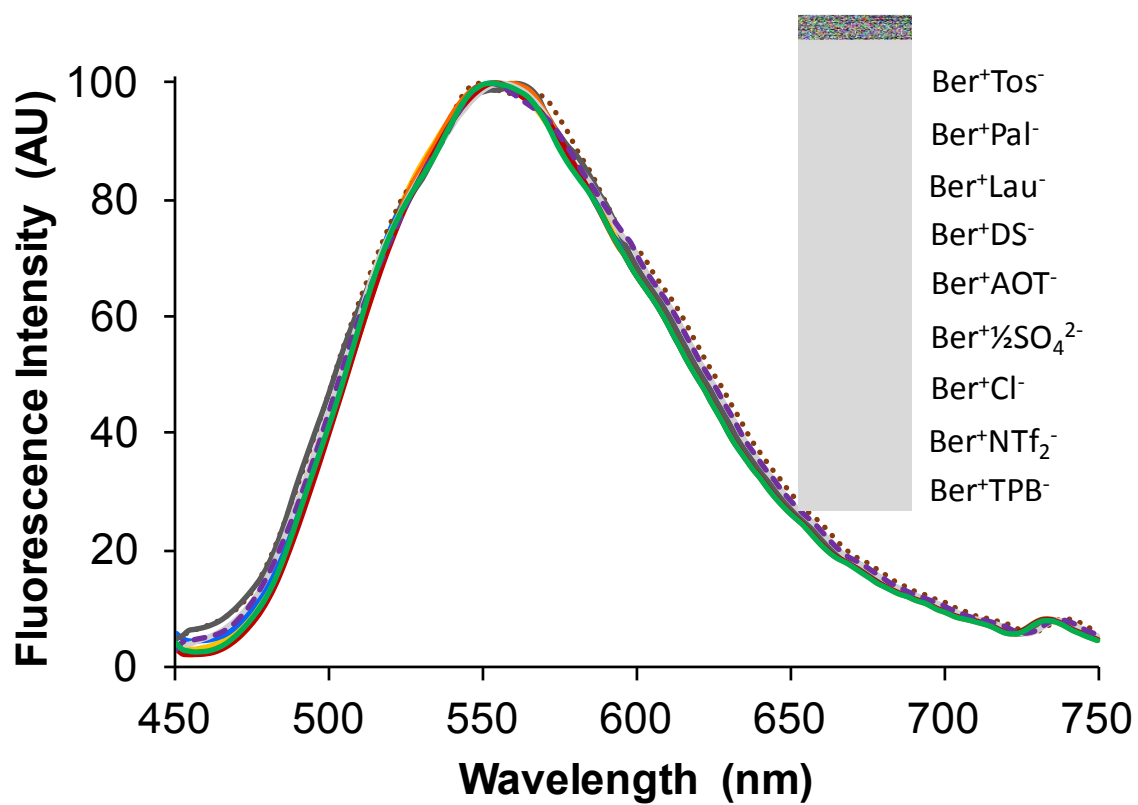

**Figure S2.** Fluorescence spectra of the berberine salts at  $1.1 \times 10^{-5}$  M in acetonitrile. All spectra were corrected and normalized.  $\lambda_{\text{ex}} = 420$  nm.

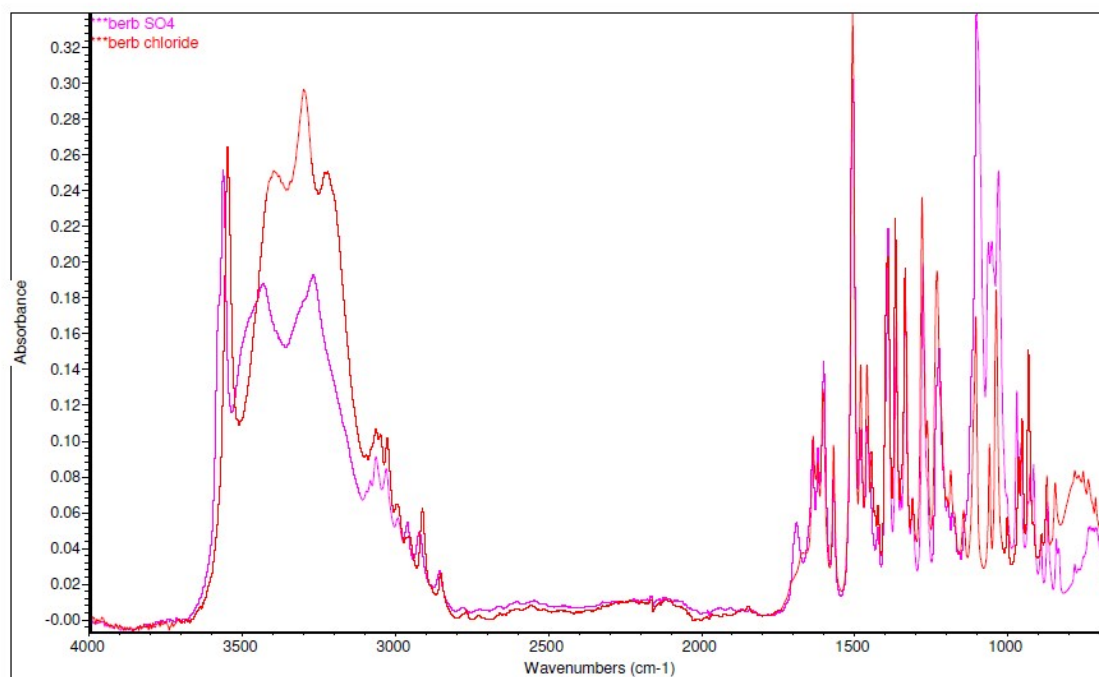

**Figure S3.** Infrared spectra of berberine chloride and berberine sulfate hydrates.

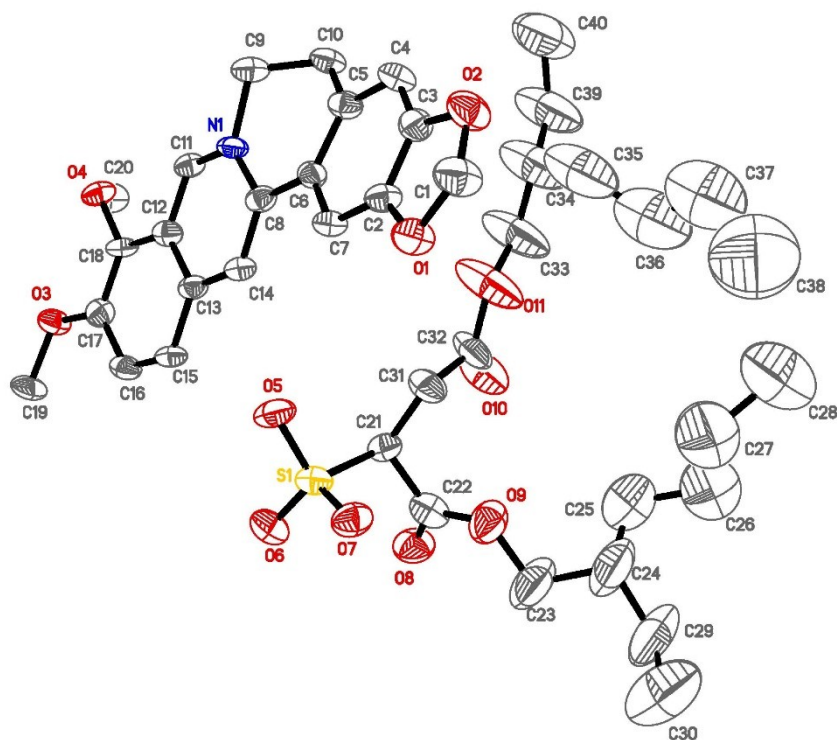

**Figure S4.** Molecular view of  $\text{Ber}^+\text{AOT}^-$ . Thermal ellipsoids are drawn at the 50% probability level. H atoms are omitted for clarity.

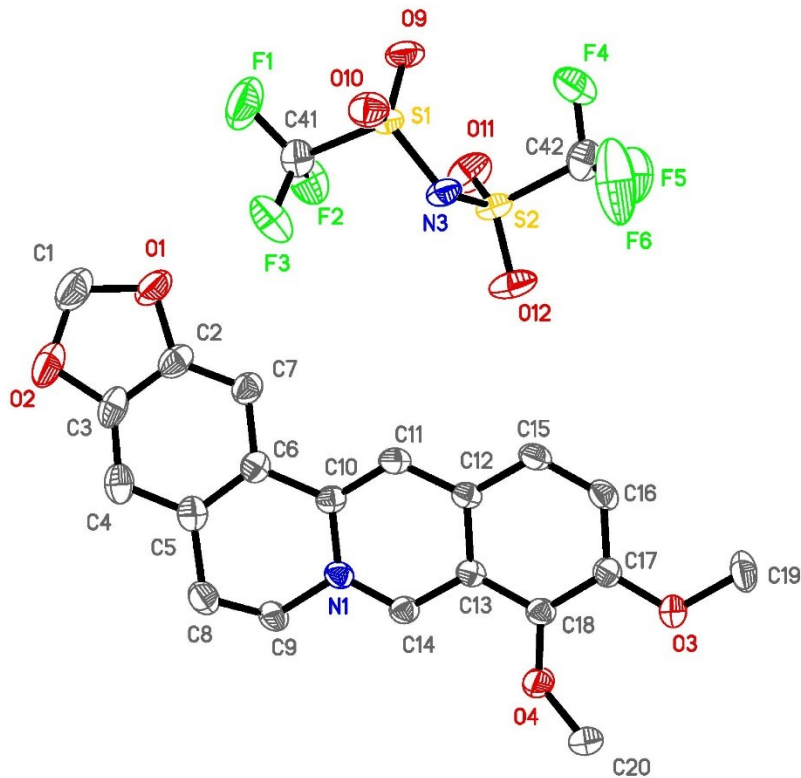

**Figure S5.** Molecular view of  $\text{Ber}^+\text{NTf}_2^-$ . Thermal ellipsoids are drawn at the 50% probability level. H atoms are omitted for clarity.

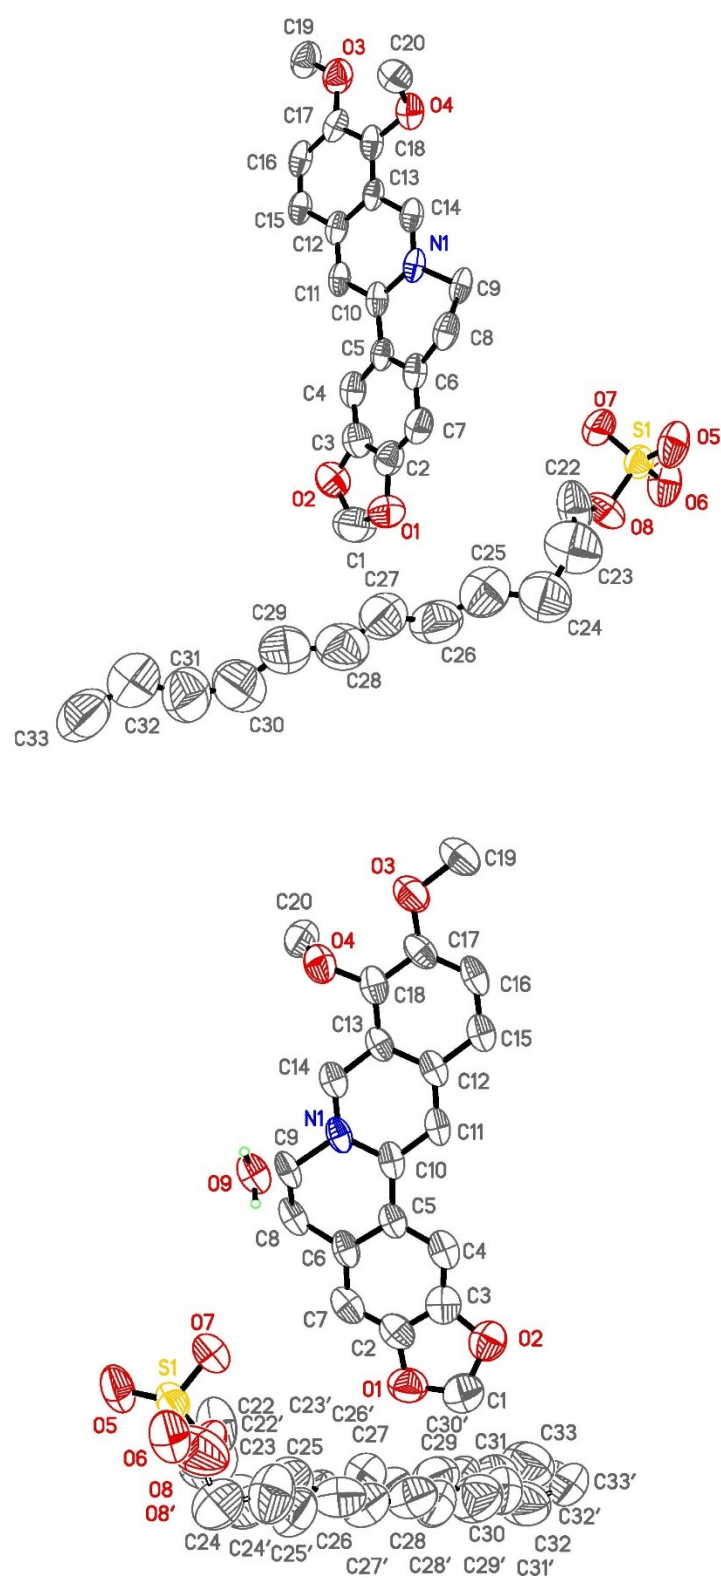

**Figure S6.** Molecular views of Ber<sup>+</sup>DS<sup>-</sup>. Thermal ellipsoids are drawn at the 50% probability level. H atoms are omitted for clarity.

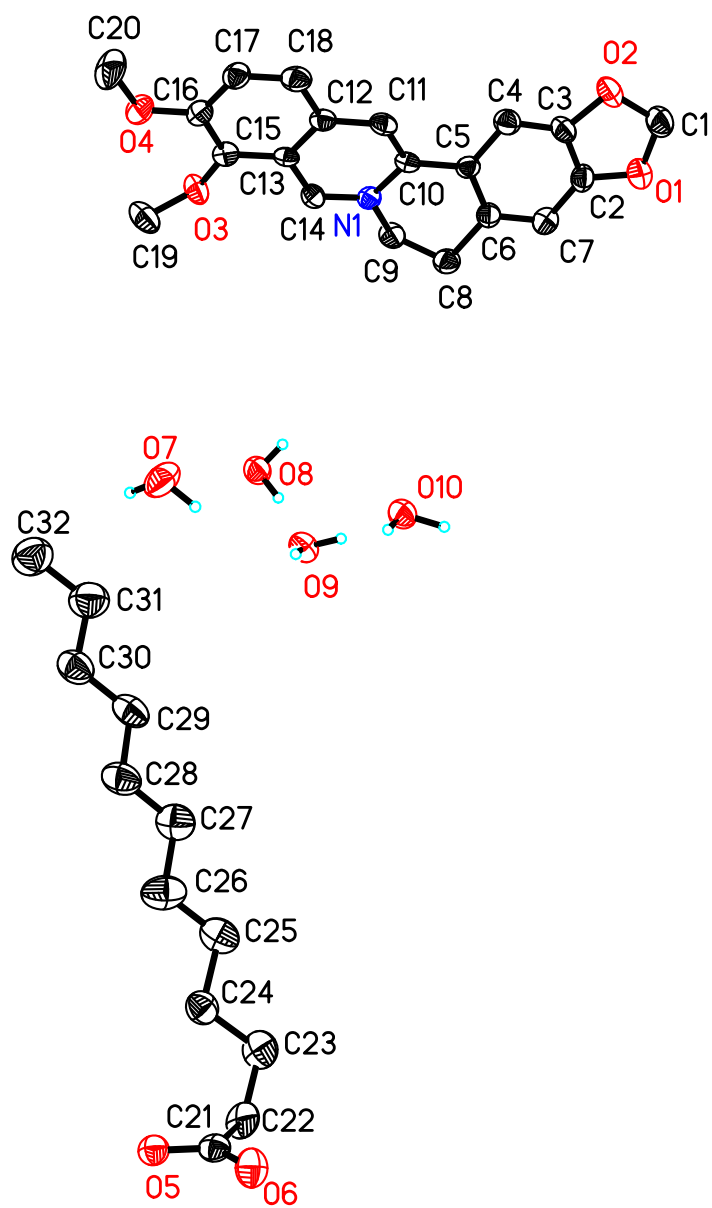

**Figure S7.** Molecular view of  $\text{Ber}^+\text{Lau}^-$ . Thermal ellipsoids are drawn at the 50% probability level. H atoms are omitted for clarity.

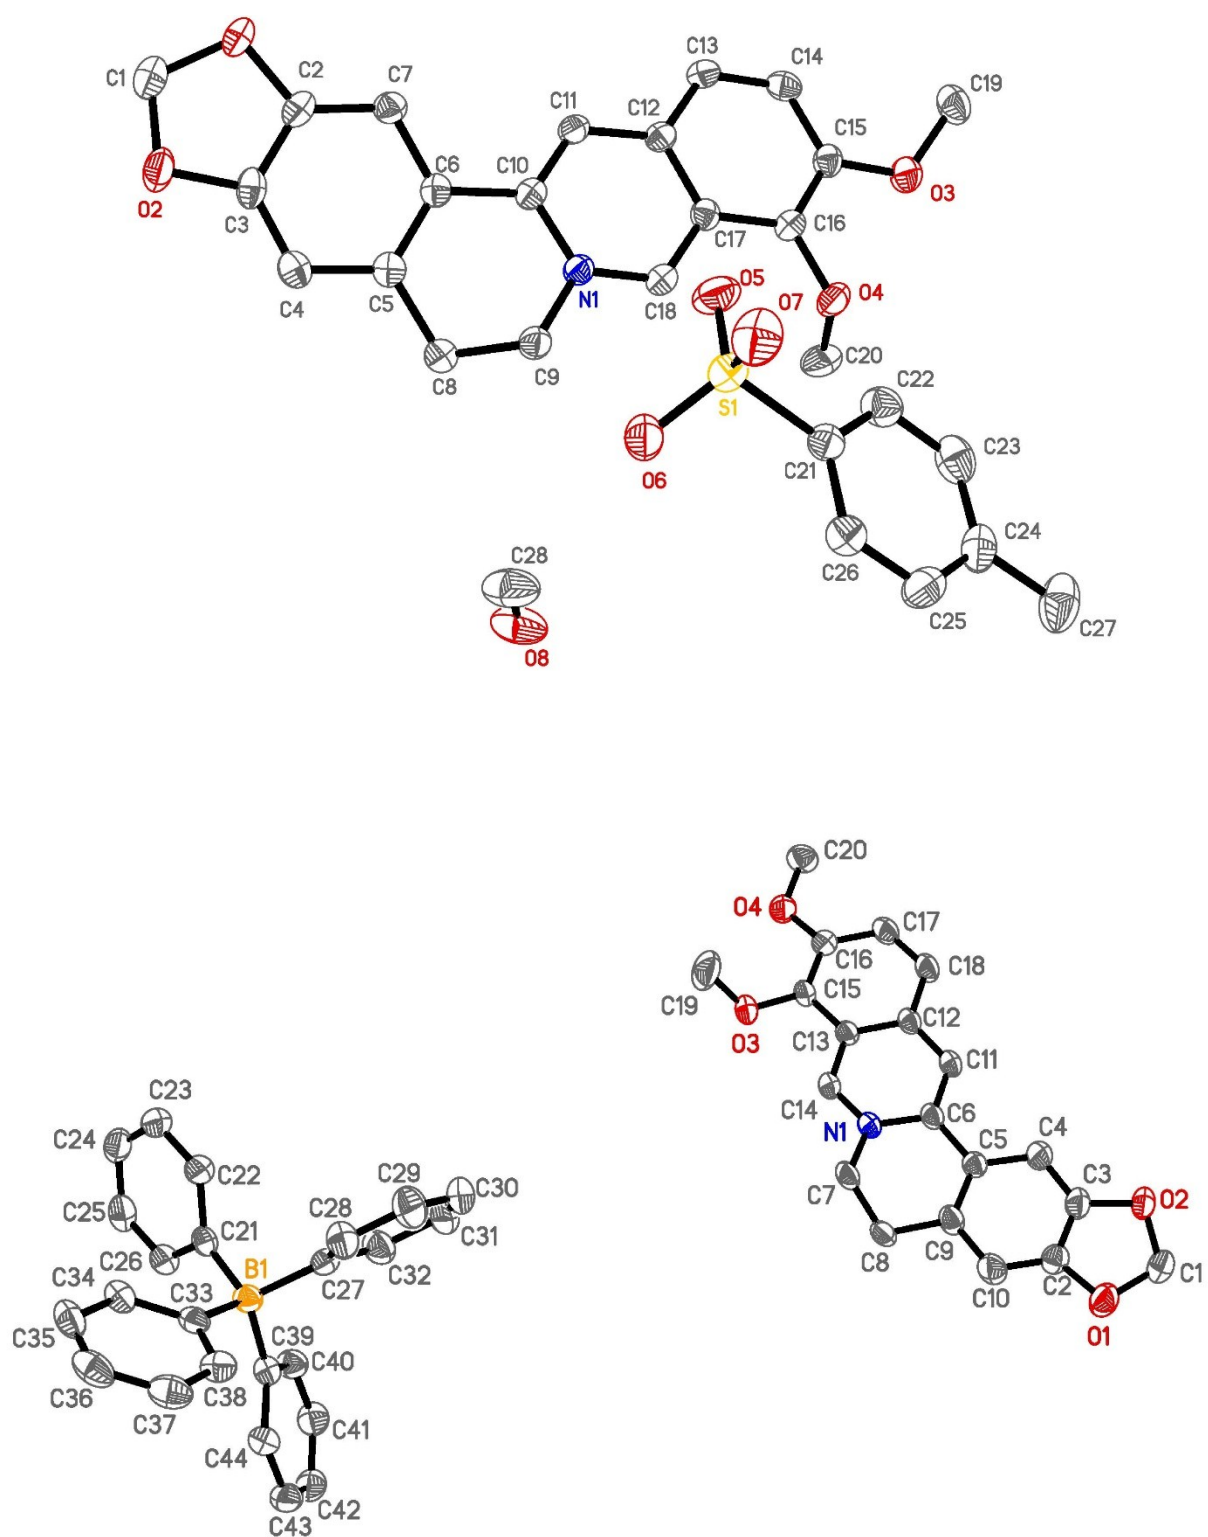

**Figure S8.** Molecular views of Ber<sup>+</sup>Tos<sup>-</sup> (top) and Ber<sup>+</sup>TPB<sup>-</sup> (bottom). Thermal ellipsoids are drawn at the 50% probability level. H atoms are omitted for clarity.
